# Supplementary material for: Harnessing mutagenic homologous recombination for targeted mutagenesis in vivo by TaGTEAM
Source: PubMed Central journal article supplement — Nucleic Acids Res. 2013 Mar 7;41(9):e99. doi: 10.1093/nar/gkt150 (PMC3643572; doi:10.1093/nar/gkt150), 2013-03-07
Supplement: supp_gkt150_nar-00003-met-k-2013-File007.pdf [file supp_gkt150_nar-00003-met-k-2013-File007.pdf]

## Supplemental Figures

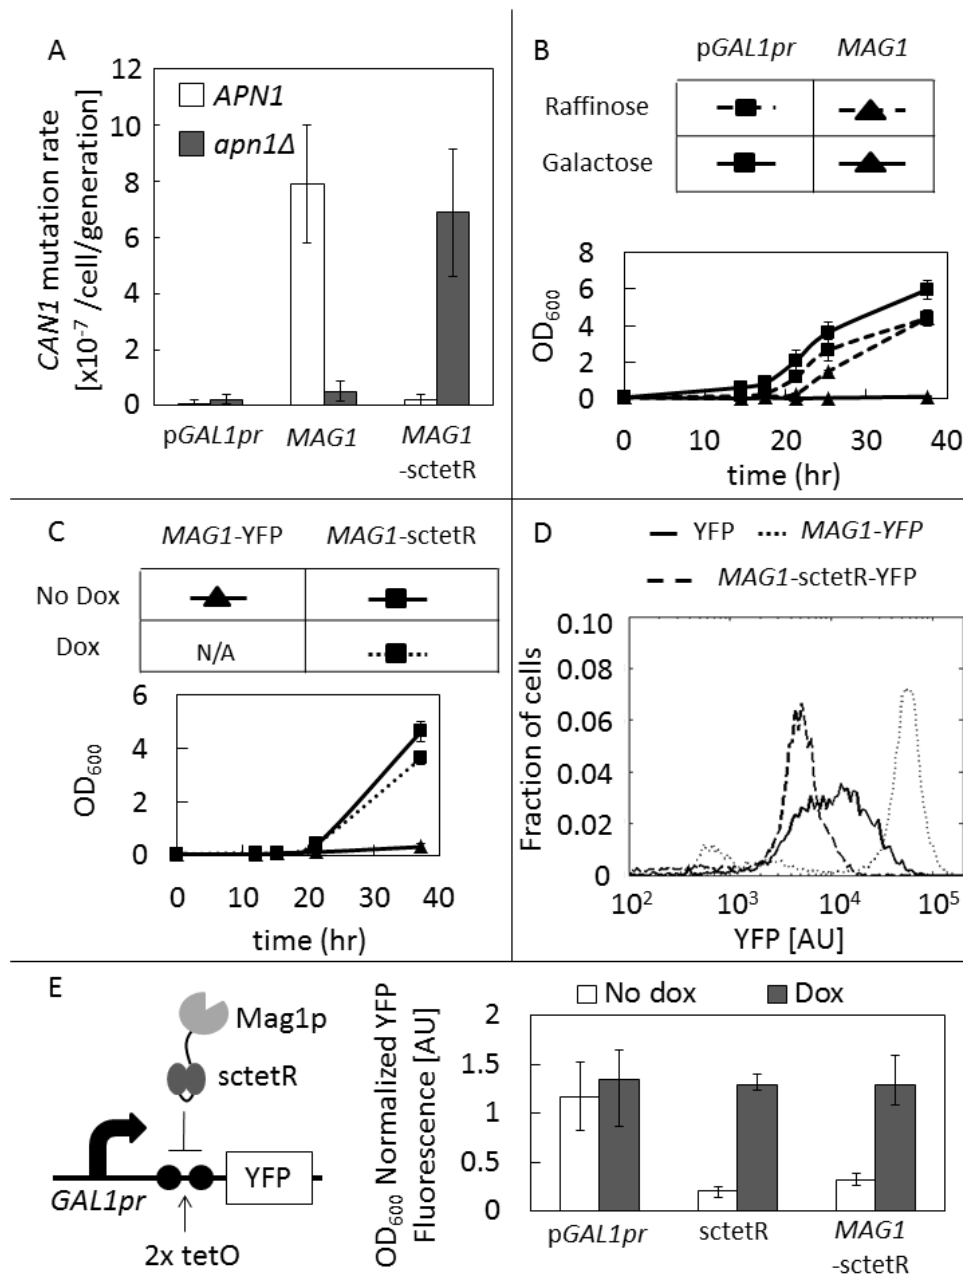

**Figure S1: The mutator protein *MAG1* and DNA binding domain *sctetR* are functional and retain function when fused.** (A) *MAG1* overexpression in WT cells leads to an increase in the background mutation rate at *CAN1* as compared to an empty vector (*pGAL1pr*). The *MAG1-sctetR* fusion has decreased but significant mutator activity, as evidenced by the increased mutation rate in an *apn1Δ*. Surprisingly, *MAG1* overexpression in an *apn1Δ* does not lead to a measurable increase in the mutation rate. This is (B) due to a severe growth defect, which is (C) relieved specifically upon fusion to *sctetR* and does not depend on *sctetR*'s ability to bind DNA (+dox growth curve). (D) The reduction in mutator function upon fusion to *sctetR* could in part be due to decreased expression levels as measured by flow cytometry on YFP-tagged mutators. (E) The *MAG-sctetR* fusion protein retains the ability to bind *tetO* as measured by fluorescence knockdown from a *tet*-repressible promoter in WT cells. Error bars on mutation rate represent 95% c.i. Error bars on fluorescence knockdown and growth represent the range of values observed in triplicate experiments.

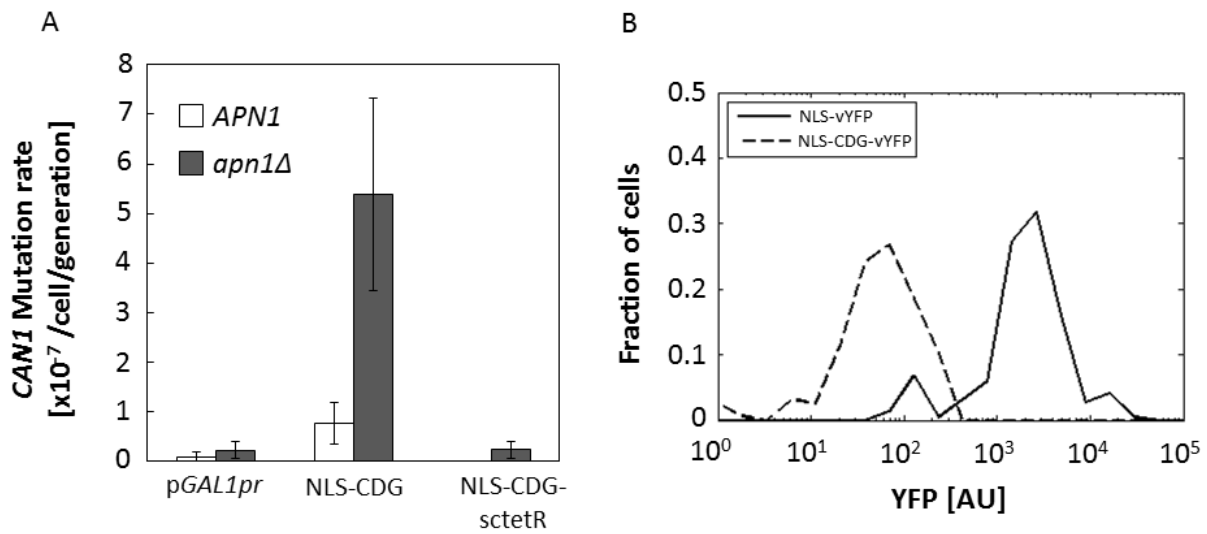

**Figure S2: CDG-sctetR does not retain ability to mutate DNA.** As alluded to in the main text, we also (A) CDG but not CDG-sctetR increases the background mutation rate in *apn1*Δ as compared to an empty vector (*pGAL1pr*). (B) Expression of a nuclear localization signal (NLS)-tagged CDG-vYFP fusion was measured by fluorescence microscopy. Histograms represent cellular autofluorescence-subtracted YFP expression in arbitrary units (AU) as measured by fluorescence microscopy. Expression of CDG-YFP is significantly lower than both NLS-vYFP and *MAG1*-vYFP (Fig. S2C), possibly explaining its lack of activity. Error bars represent 95% c.i.

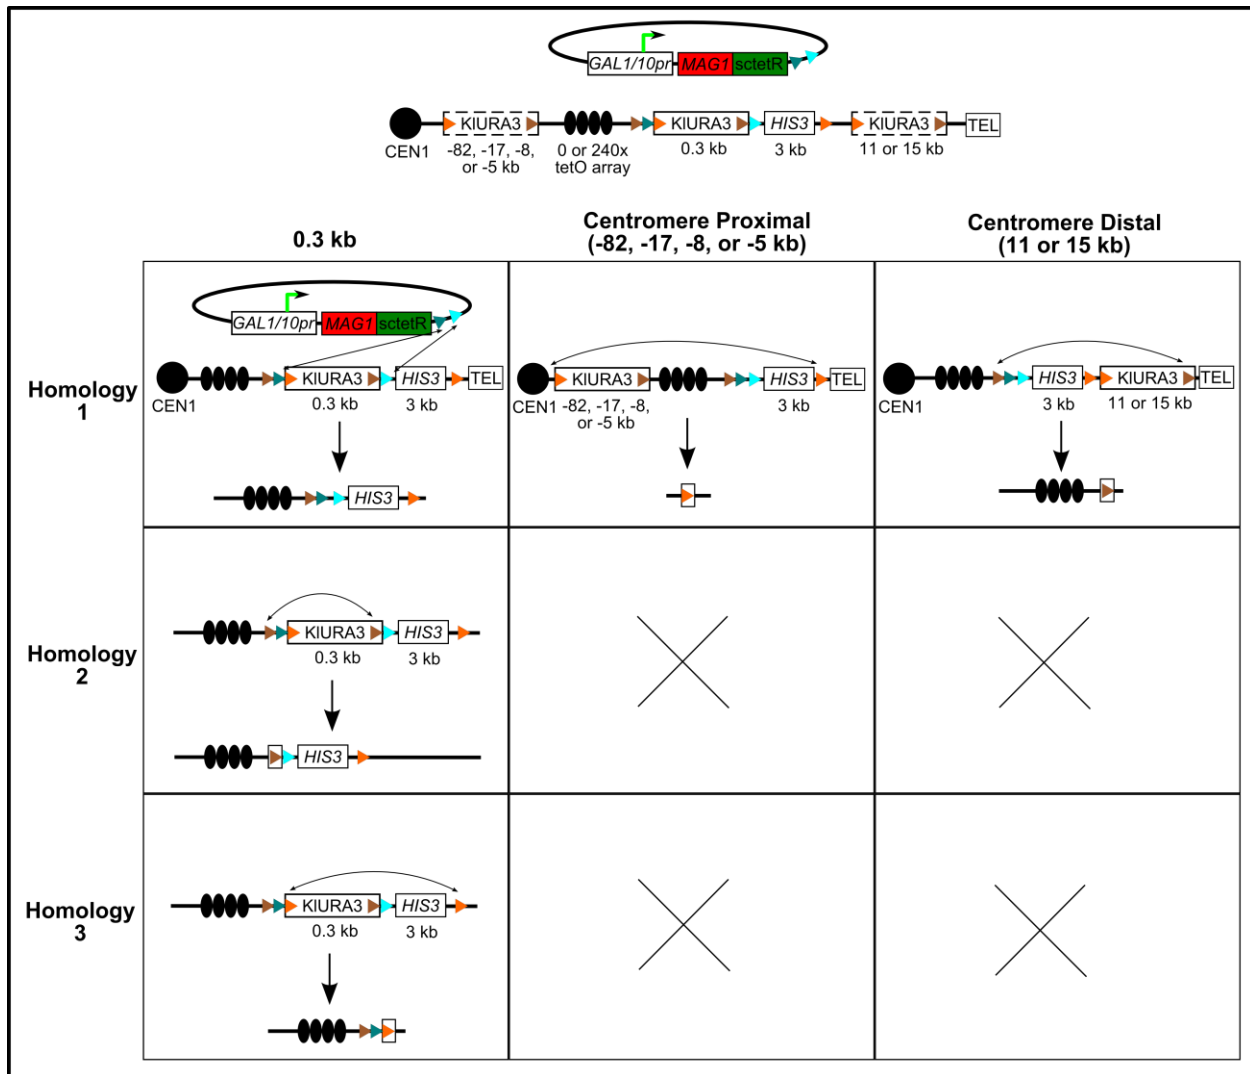

**Figure S3: Inter and intra-chromosomal repetitive homologous sequences lead to deletions.** Various repetitive homologous sequences introduced during strain construction—17 bp (brown), 18 bp (orange), 201 bp (dark cyan), 430 bp (light cyan)—can mediate different HR-dependent deletions of the mutation rate marker *KIURA3* depending on its position. At 0.3 kb there are three possible deletions, only one of which leads to simultaneous deletion of the *HIS3* marker. At all other positions, there is only one possible deletion, and it always results in simultaneous deletion of the *HIS3* marker.

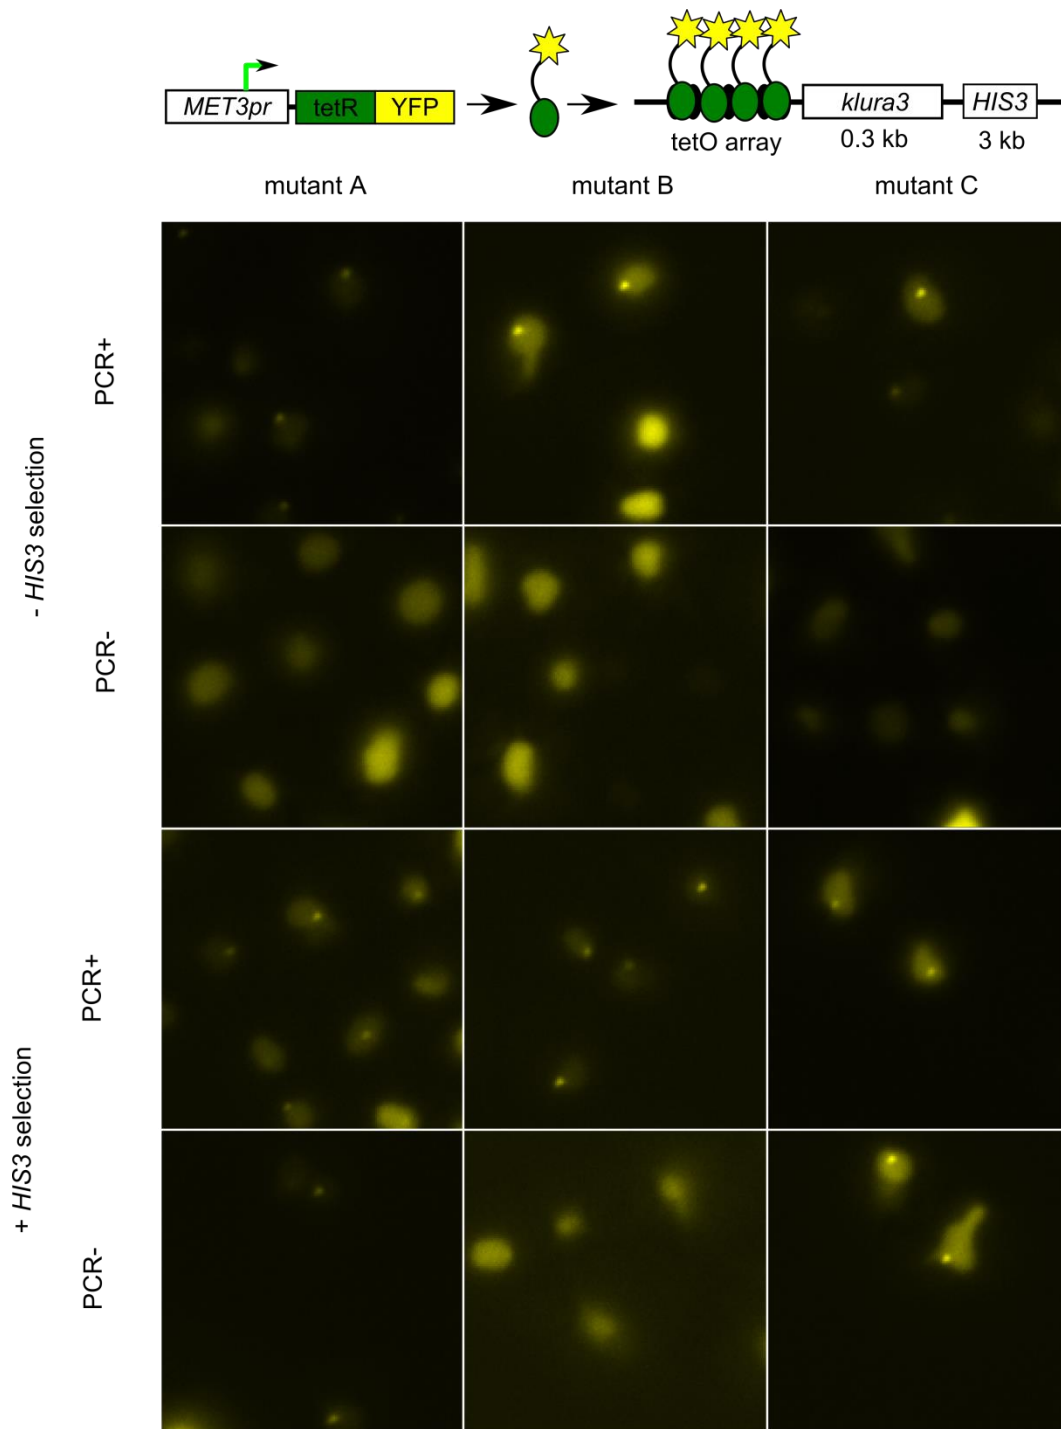

**Figure S4: Localization of tetR-YFP and YFP foci observation confirms 240x tetO array presence in point mutants.** Transformation of a plasmid delivering a methionine-inducible fusion of tetR to YFP shows that PCR+ mutants created in the absence of selection for *HIS3* retain the array while PCR- mutants do not. Under selection, all PCR+ and most PCR- mutants retain the array, consistent with a *KIURA3* deletion by repetitive homology that preserves the *HIS3* marker (see Fig. S4).

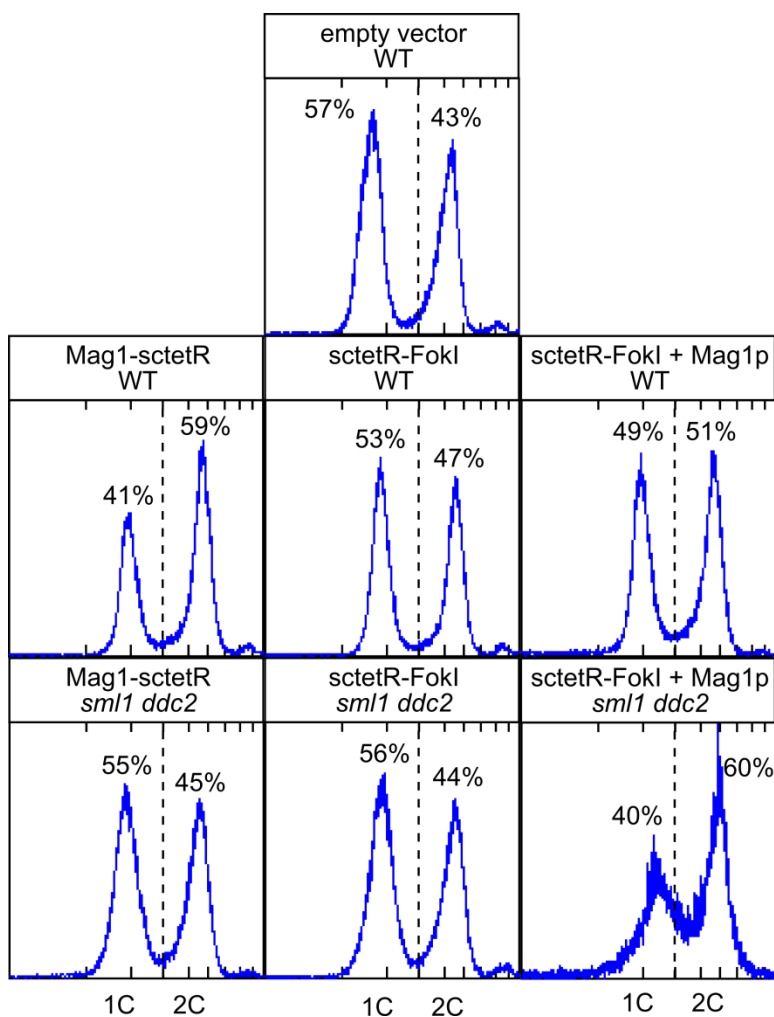

**Figure S5: Cell cycle distributions show importance of DNA damage checkpoint activation in DSB repair fate.** Compared to sctetR-FokI, Mag1-sctetR expression increases the fraction of cells with 2C DNA content as determined by flow cytometric analysis of exponentially growing cells stained with SYTOX green. This increase is indicative of the DNA damage checkpoint activation because it is eliminated in checkpoint-deficient (*sm11 ddc2*) strains. Co-expression of Mag1p causes increased checkpoint activation as compared to expression of sctetR-FokI alone. Checkpoint-deficient strains co-expressing Mag1p grow significantly slower than other strains, explaining why the number of cells with 2C DNA content increases in this case.

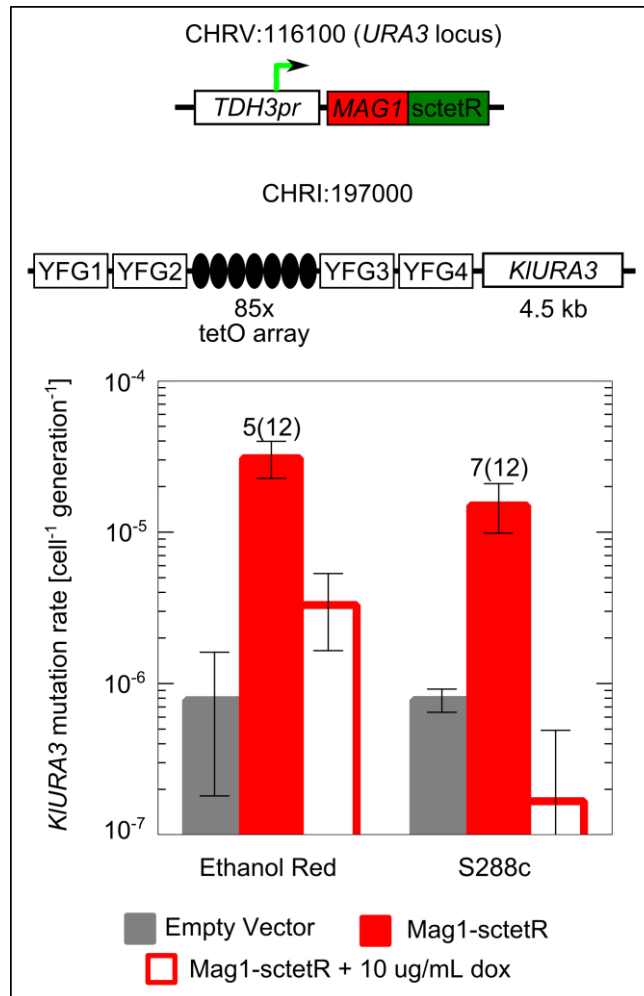

**Figure S6: Deployment of TaGTEAM in application scenarios.** Other strains and expression scenarios also support targeted point mutations by TaGTEAM. Constitutive expression of Mag1-sctetR from a strong, commonly used promoter allows targeted mutagenesis in a variety of carbon sources in prototrophic lab (S288c) and industrial (Ethanol Red) strains of yeast. The mutator and target genes were inserted without the addition of markers. Numbers refer to PCR+(total) mutants. Error bars represent 95% c.i.

## Supplemental Tables

**Table S1: Strain List**

| Name   | Parent | Genetic change                                                    | Integrating plasmid/<br>PCR primers | Usage notes                                                                                                                                                                                                                                 |
|--------|--------|-------------------------------------------------------------------|-------------------------------------|---------------------------------------------------------------------------------------------------------------------------------------------------------------------------------------------------------------------------------------------|
| NY0003 | N/A    | <i>MATa ade2-1 trp1-1 can1-100 leu2-3,112 his3-11,5 ura3 GAL+</i> | N/A                                 | W303 base strain, confirmed to be <i>RAD5</i> using the protocol recommended by the SGD community wiki ( <a href="http://wiki.yeastgenome.org/index.php/CommunityW303.html">http://wiki.yeastgenome.org/index.php/CommunityW303.html</a> ). |
| NY0339 | NY0003 | <i>can1-100Δ::KIURA3</i>                                          | primers 1 and 2                     |                                                                                                                                                                                                                                             |
| NY0343 | NY0339 | <i>klura3Δ::CAN1</i>                                              | primers 3 and 4                     |                                                                                                                                                                                                                                             |
| NY0378 | NY0343 | <i>apn1Δ::KanR</i>                                                | primers 5 and 6                     |                                                                                                                                                                                                                                             |
| NY0389 | NY0343 | CHRI197000::pNB0537                                               | Integration of pNB0537              |                                                                                                                                                                                                                                             |
| NY0526 | NY0389 | CHRI180000:: <i>KIURA3</i>                                        | primers 7 and 8                     | centromeric side distance dependence                                                                                                                                                                                                        |
| NY0542 | NY0389 | CHRI209000:: <i>KIURA3</i>                                        | primers 15 and 16                   | telomeric side distance dependence                                                                                                                                                                                                          |
| NY0543 | NY0389 | CHRI213000:: <i>KIURA3</i>                                        | primers 17 and 18                   | telomeric side distance dependence                                                                                                                                                                                                          |
| NY0544 | NY0389 | CHRI189000:: <i>KIURA3</i>                                        | primers 9 and 10                    | centromeric side distance dependence                                                                                                                                                                                                        |
| NY0545 | NY0389 | CHRI192000:: <i>KIURA3</i>                                        | primers 11 and 12                   | centromeric side distance dependence                                                                                                                                                                                                        |
| NY0554 | NY0389 | pNB0537:: <i>KIURA3</i>                                           | primers 13 and 14                   | 240x array targeted mutagenesis test strain                                                                                                                                                                                                 |
| NY0612 | NY0339 | <i>ade2-1Δ::CgTRP1</i>                                            | primers 19 and 20                   | clean delete of entire <i>ade2</i> cassette                                                                                                                                                                                                 |
| NY0619 | NY0624 | <i>his3-11,5::pNB0603</i>                                         | Integration of pNB0603              | plasmid targeted mutagenesis test strain                                                                                                                                                                                                    |
| NY0620 | NY0624 | <i>his3-11,5::pRS303</i>                                          | Integration of pRS303               | plasmid targeted mutagenesis test strain empty vector control                                                                                                                                                                               |
| NY0737 | NY0544 | <i>exo1Δ::KanR</i>                                                | Primers 21 and 22                   |                                                                                                                                                                                                                                             |
| NY0739 | NY0554 | <i>exo1Δ::KanR</i>                                                | Primers 21 and 22                   |                                                                                                                                                                                                                                             |
| NY0763 | NY0343 | CHRI197000::pNB0673                                               | Integration of pNB0673              |                                                                                                                                                                                                                                             |
| NY0775 | NY0544 | <i>sgs1Δ::CgTRP1</i>                                              | Primers 23 and 24                   |                                                                                                                                                                                                                                             |
| NY0777 | NY0554 | <i>sgs1Δ::CgTRP1</i>                                              | Primers 23 and 24                   |                                                                                                                                                                                                                                             |
| NY0873 | NY0763 | pNB0673:: <i>KIURA3</i>                                           | primers 13 and 14                   | 0x array test strain                                                                                                                                                                                                                        |
| NY0874 | NY0389 | CHRI118000:: <i>KIURA3</i>                                        | Primers 25 and 26                   | centromeric side distance dependence                                                                                                                                                                                                        |
| NY0883 | NY0554 | <i>RAD52::RAD52-CFP-KanR</i>                                      | Primers 27 and 28                   | 240x array Rad52-CFP strain                                                                                                                                                                                                                 |
| NY0885 | NY0873 | <i>RAD52::RAD52-CFP-KanR</i>                                      | Primers 27 and 28                   | no array Rad52-CFP strain                                                                                                                                                                                                                   |
| NY0894 | NY0873 | <i>rev3Δ::CgTRP1</i>                                              | Primers 29 and 30                   |                                                                                                                                                                                                                                             |
| NY0896 | NY0873 | <i>rad52Δ::CgTRP1</i>                                             | Primers 31 and 32                   |                                                                                                                                                                                                                                             |
| NY0901 | NY0544 | <i>rev3Δ::CgTRP1</i>                                              | Primers 29 and 30                   |                                                                                                                                                                                                                                             |
| NY0903 | NY0544 | <i>rad52Δ::CgTRP1</i>                                             | Primers 31 and 32                   |                                                                                                                                                                                                                                             |
| NY0909 | NY0554 | <i>rev3Δ::CgTRP1</i>                                              | Primers 29 and 30                   |                                                                                                                                                                                                                                             |
| NY0911 | NY0554 | <i>rad52Δ::CgTRP1</i>                                             | Primers 31 and 32                   |                                                                                                                                                                                                                                             |
| NY0923 | NY0873 | <i>exo1Δ::KanR</i>                                                | Primers 21 and 22                   |                                                                                                                                                                                                                                             |
| NY0924 | NY0873 | <i>sgs1Δ::CgTRP1</i>                                              | Primers 23 and 24                   |                                                                                                                                                                                                                                             |
| NY0927 | NY0343 | CHRI197000::pNB0775                                               | Integration of pNB0775              | 85x no homology test strain                                                                                                                                                                                                                 |
| NY0931 | NY0737 | <i>sgs1Δ::CgTRP1</i>                                              | Primers 23 and 24                   |                                                                                                                                                                                                                                             |

|        |        |                                  |                        |                                         |
|--------|--------|----------------------------------|------------------------|-----------------------------------------|
| NY0932 | NY0739 | <i>sgs1Δ::CgTRP1</i>             | Primers 23 and 24      |                                         |
| NY0951 | NY0554 | <i>sml1Δ::CgTRP1</i>             | Primers 33 and 34      |                                         |
| NY0971 | NY0951 | <i>ddc2Δ::KanR</i>               | Primers 35 and 36      |                                         |
| NY0973 | N/A    | Ethanol Red <i>MATA/α</i>        | N/A                    | Kind gift of K. Verstrepen              |
| NY0977 | NY0973 | Ethanol Red <i>MATα</i>          | N/A                    | Sporulation of NY0973                   |
| NY1005 | N/A    | S288c                            | N/A                    | FY5 from Fink lab at MIT                |
| NY1009 | NY1005 | <i>URA3::ura3</i>                | Primers 37 and 38      |                                         |
| NY1010 | NY1005 | <i>ura3Δ::TDH3pr-Mag1-sctetR</i> | Primers 37 and 38      |                                         |
| NY1014 | NY0977 | <i>URA3::ura3</i>                | Primers 37 and 38      |                                         |
| NY1015 | NY0977 | <i>ura3Δ::TDH3pr-Mag1-sctetR</i> | Primers 37 and 38      |                                         |
| NY1066 | NY1009 | CHRI197000::pNB0849              | integration of pNB0849 | S288c empty vector control strain       |
| NY1068 | NY1014 | CHRI197000::pNB0849              | integration of pNB0849 | Ethanol Red empty vector control strain |
| NY1077 | NY1010 | CHRI197000::pNB0849              | integration of pNB0849 | S288c test strain                       |
| NY1113 | NY1015 | CHRI197000::pNB0849              | integration of pNB0849 | Ethanol Red test strain                 |

- Yeast transformations were performed using the method in (48).

- *CgTRP1* refers to the copy of the *TRP1* gene from *Candida glabrata*, used here to prevent recombination at the native *TRP1* locus.

- All distances on chromosome I correspond to positions in the reference sequence (S288C background). W303 differs significantly in this region from the reference sequence, and primers were designed using the known W303 sequence (49).

(<http://www.sanger.ac.uk/research/projects/genomeinformatics/sgrp.html>). Distances were confirmed by PCR (primers 42, 48, and 105-108) from one position to the next.

- Clean delete means deletion of the promoter, ORF, and terminator of a gene so as to remove any possible homology for marker recombination during fluctuation analysis.



**Table S2: Plasmid List**

| Name                          | Cloning Method | Backbone                     | Insert(s)                                                     | Insert PCR primers | Addgene deposited | Usage notes                                   |
|-------------------------------|----------------|------------------------------|---------------------------------------------------------------|--------------------|-------------------|-----------------------------------------------|
| Plasmids used                 |                |                              |                                                               |                    |                   |                                               |
| pLAU44                        |                | Kind gift of D. Sherrat (50) |                                                               |                    |                   |                                               |
| pRS4D1                        |                | Kind gift of J. Collins (51) |                                                               |                    |                   |                                               |
| pCDG                          |                | Kind gift of B. Demple (32)  |                                                               |                    |                   |                                               |
| pYES-MAG                      |                | Kind gift of L. Samson (29)  |                                                               |                    |                   |                                               |
| pWH610(B+sB)                  |                | Kind gift of W. Hillen (30)  |                                                               |                    |                   |                                               |
| Plasmids constructed and used |                |                              |                                                               |                    |                   |                                               |
| pNB0298                       | Ligation       | PRS415 (XhoI/BamHI)          | <i>GAL1pr</i> (XhoI/BamHI)                                    | 64 and 65          | no                | <i>pGAL1pr</i>                                |
| pNB0435                       | Ligation       | pNB0298 (SpeI/SacI)          | NLS-CDG (SpeI/SacI)                                           | 66 and 67          | no                |                                               |
| pNB0437                       | Ligation       | pNB0298 (SpeI/SacI)          | <i>MAG1</i> (SpeI/SacI)                                       | 68 and 69          | no                |                                               |
| pNB0441                       | Ligation       | pNB0435 (Sall/SacI)          | <i>ACT1t</i> (Sall/SacI)                                      | 70 and 71          | no                |                                               |
| pNB0443                       | Ligation       | pNB0437 (Sall/SacI)          | <i>ACT1t</i> (Sall/SacI)                                      | 70 and 71          | no                |                                               |
| pNB0449                       | Ligation       | pNB0441 (NgoMIV/XhoI)        | none (blunted)                                                | N/A                | no                | NLS-CDG                                       |
| pNB0450                       | Ligation       | pNB0443 (NgoMIV/XhoI)        | none (blunted)                                                | N/A                | no                | <i>MAG1</i>                                   |
| pNB0451                       | Ligation       | pRS4D1 (NotI/SacI)           | none (blunted)                                                | N/A                | no                | sctetR binding test by fluorescence knockdown |
| pNB0461                       | Gap repair     | pNB0449 (Sall/NotI)          | sctetR                                                        | 72 and 73          | no                | NLS-CDG-sctetR                                |
| pNB0470                       | Gap repair     | pNB0450 (SpeI/Sall)          | sctetR                                                        | 74 and 73          | no                | sctetR                                        |
| pNB0471                       | Gap repair     | pNB0450 (Sall/NotI)          | vYFP                                                          | 75 and 76          | no                | <i>MAG1</i> -vYFP                             |
| pNB0472                       | Gap repair     | pNB0450 (Sall/NotI)          | sctetR                                                        | 77 and 73          | yes               | plasmid <i>MAG1</i> -sctetR                   |
| pNB0473                       | Gap repair     | pNB0449 (Sall/NotI)          | vYFP                                                          | 78 and 76          | no                | NLS-CDG-vYFP                                  |
| pNB0476                       | Gap repair     | pNB0450 (SpeI/Sall)          | vYFP                                                          | 79 and 76          | no                | NLS-vYFP                                      |
| pNB0602                       | Gap repair     | pNB0450 (Sall/NotI)          | sctetR-cYFP                                                   | 91 and 90          | no                | <i>MAG1</i> -sctetR-cYFP                      |
| pNB0603                       | Ligation       | PRS303 (XhoI/SacI)           | pNB0298 (XhoI/SpeI) and pNB0472 (SpeI/SacI)                   | N/A                | yes               | integrated <i>MAG1</i> -sctetR                |
| pNB0537                       | Ligation       | pLAU44 (NotI/XbaI)           | CHRI 5' homology (AscI/XbaI) and CHRI 3' homology (NotI/AscI) | 93 to 96           | yes               | integrated 240x tetO array                    |
| pNB0568                       | Ligation       | pBS (NotI/XbaI)              | pNB0537 (NotI/XbaI)                                           | N/A                | no                |                                               |
| pNB0586                       | Ligation       | pRS316 (XbaI/XhoI)           | 240x tetO array (XbaI/XhoI)                                   | N/A                | yes               | plasmid 240x tetO array                       |
| pNB0640                       | Ligation       | pNB0586 (XhoI)               | <i>ade2-1</i> cassette (XhoI)                                 | 97 and 98          | no                | plasmid 240x tetO array w/ <i>ade2-1</i>      |
| pNB0653                       | Ligation       | pBS (ApaI/HindIII)           | <i>KIURA3</i> cassette                                        | 99 and 100         | no                |                                               |
| pNB0663                       | Ligation       | pNB0450 (BamHI/Sall)         | FokI (19) (BamHI/XhoI)                                        | N/A                | no                |                                               |
| pNB0665                       | Gap repair     | pNB0663 (BamHI)              | sctetR                                                        | 88 and 103         | yes               | sctetR-FOKI                                   |
| pNB0673                       | Ligation       | pNB0537 (XhoI/XbaI)          | none (blunted)                                                | N/A                | no                | integrated 0x tetO array                      |
| pNB0763                       | Ligation       | pBS (EcoRI/XmaI)             | pNB0537 (EcoRI/XmaI)                                          |                    |                   |                                               |
| pNB0773                       | Ligation       | pNB0763 (NotI/XbaI)          | pNB0568 (NotI/XbaI)                                           | N/A                | no                |                                               |
| pNB0775                       | Ligation       | pNB0773 (NgoMIV/HindIII)     | pNB0653 (NgoMIV/HindIII)                                      | N/A                | yes               | integrated 85x array w/o homology             |
| pNB0784                       | Ligation       | pNB0298 (XhoI/SacI)          | pNB0298 (XhoI/AgeI) and                                       | N/A                | no                |                                               |

|                                                |            |                     |                                                                                                                                                              |             |     |                                                                                                               |
|------------------------------------------------|------------|---------------------|--------------------------------------------------------------------------------------------------------------------------------------------------------------|-------------|-----|---------------------------------------------------------------------------------------------------------------|
|                                                |            |                     | pNB0665 (AgeI/SacI)                                                                                                                                          |             |     |                                                                                                               |
| pNB0785                                        | Gap repair | pNB0784 (XhoI)      | <i>MAG1-ACT1t</i>                                                                                                                                            | 101 and 102 | no  | coexpression of sctetR-FOKI and <i>MAG1</i>                                                                   |
| pNB0841                                        | Ligation   | pRS306 (NdeI/NcoI)  | fragment of <i>URA3</i>                                                                                                                                      | 104 and 105 | no  |                                                                                                               |
| pNB0843                                        | Ligation   | pNB0841 (NheI/Ascl) | <i>TDH3pr-Mag1-sctetR-ACT1t</i>                                                                                                                              | 106 and 107 | yes | integration of <i>TDH3pr-Mag1-sctetR</i> to delete <i>URA3</i>                                                |
| pNB0844                                        | Ligation   | pNB0298 (XhoI/SacI) | <i>TDH3pr</i> (XhoI/XbaI) and pNB0472 (SpeI/SacI)                                                                                                            | N/A         | no  | centromeric plasmid with <i>TDH3pr-Mag1-sctetR</i>                                                            |
| pNB0849                                        | Ligation   | pNB0775             | <i>GCN5</i> cassette (SpeI/PstI),<br><i>SPT15</i> cassette (PstI/NheI),<br><i>SPT3</i> cassette (EcoRI/BsiWI),<br><i>TAF12pr-TAF12-CYC1t</i> (BsiWI/HindIII) | 108 to 117  | yes | integration of 85x array with genes of interest and <i>KIURA3</i> at 4.5 kb, in this case genes are for gTME. |
| * Cassette means promoter, ORF, and terminator |            |                     |                                                                                                                                                              |             |     |                                                                                                               |

**Table S3: Primer List**

|                     | Name            | Sequence                                                                         | Template                     |
|---------------------|-----------------|----------------------------------------------------------------------------------|------------------------------|
| Integrating primers |                 |                                                                                  |                              |
| 1                   | CgCan1KO(+)     | tcttcagacttctaactcctgtataaaacaaaaaaaaaaaggcatagc CACAGGAAAC<br>AGCTATGACC        | <i>KIURA3</i> on pBluescript |
| 2                   | CgCan1KO(-)     | agaatcgaaatggcgtggaaatgtgatcaaagtaataaaacgtcatat GTTGTA AAC<br>GACGGCCAGT        | "                            |
| 3                   | CAN1insv2(+)    | GGTTGCGAACAGAGTAAACCGAATCAGGG                                                    | <i>CAN1</i>                  |
| 4                   | CAN1insv2(-)    | GCTTCTACTCCGTCTGCTTTCTTTTCGGG                                                    | "                            |
| 5                   | APN1KO-Kanv2(+) | ATGCCTTCGACACCTAGCTTTGTTAGATCTGCTGTCTCGAAATACAAATT<br>GATCTGTTTAGCTTGCTCGTCCC    | pNB0132                      |
| 6                   | APN1KO-Kanv2(-) | TTATCTTTCTTAGTCTTCTCTTCTTTGTCATTTGTGACAAGATATCAT<br>AAACTGGATGGCGGCGGTTAG        | "                            |
| 7                   | URA-17kb(+)     | GTTAGTTAGTTACTGTTAGGACGCTTCGGCGAGCTGATGTCTGACTTCTC<br>CACTATAGGGCGAATTGGGTAC     | <i>KIURA3</i> on pBluescript |
| 8                   | URA-17kb(-)     | TTACGGCCATTATCAGCGGTA AACACCCAAGGTGTTGACTAAGTGATGG<br>AAAGGGAACAAAAGCTGGAGC      | "                            |
| 9                   | URA-8kb(+)      | agattccaagcaagcttttagtggaaatcatcgcgcaagccagcggt<br>CACTATAGGGCGAATTGGGTAC        | <i>KIURA3</i> on pBluescript |
| 10                  | URA-8kb(-)      | TCCGCACGTCCTACGTTTAGAAAGTAACGATGCCAATCTTCATCACGGTA<br>AAAGGGAACAAAAGCTGGAGC      | "                            |
| 11                  | URA-5kb(+)      | TTTGGAAGTGA CTGGCGCCGCTGGCTACTATAATAGCAGCGACTGTA<br>CACTATAGGGCGAATTGGGTAC       | <i>KIURA3</i> on pBluescript |
| 12                  | URA-5kb(-)      | TTGGTGACGTTCTCGTCGGCGAGTAAAAGAGGTAATCCAACGACGGGAT<br>AAAGGGAACAAAAGCTGGAGC       | "                            |
| 13                  | URAsfm(+)       | actccccctttccagtcgggaacctgtgctgccagctgcattaatgaa<br>CACTATAGGGCGAATTGGGTAC       | <i>KIURA3</i> on pBluescript |
| 14                  | URAsfm(-)       | GCACACAGCCCAGCTTGGAGCGAACGACTACACCGA ACTGAGATACCTA<br>AAAGGGAACAAAAGCTGGAGC      | "                            |
| 15                  | URA3kbv3(+)     | atcgaataaaatgctgtatcacggcgattatccatggcgaaatgagg<br>CACTATAGGGCGAATTGGGTAC        | <i>KIURA3</i> on pBluescript |
| 16                  | URA3kbv4(-)     | GGTGTTAGATACGGATGTGAAAGGGCGATAAGACATTTGGAAGTTAATGA<br>AAAGGGAACAAAAGCTGGAGC      | "                            |
| 17                  | URA11kbv2(+)    | gcagctttacacttctggcactaataatgtggcctcaggagccacaga<br>CACTATAGGGCGAATTGGGTAC       | <i>KIURA3</i> on pBluescript |
| 18                  | URA11kb(-)      | GAATACTGGTAAAATTTATATTCATCCCACTTTTCTCTGGCCTGCTGG<br>AAAGGGAACAAAAGCTGGAGC        | "                            |
| 19                  | CgKO-ADE2(+)    | gcgactaccagtatatcatctctatttcgtaaatcaaatgtattata CACAGGAAAC<br>AGCTATGACC         | <i>CgTRP1</i> on pBluescript |
| 20                  | CgKO-ADE2(-)    | ATTGAGCCGCTTATATGAACTGTATCGAAACGTTATTTTTTAATCGCA<br>GTTGTAAAAC GACGGCCAGT        | "                            |
| 21                  | PrKO-EXO1(+)    | ATGGGTATCC AAGGTCTTCT TCCTCAGTTA AAGCCATAC AGAATCCAGT<br>GATCTGTTTAGCTTGCTCGTCCC | pNB0132                      |
| 22                  | PrKO-EXO1(-)    | TTTATAACAAATTGGGAAAGCAAGGAGATAGATCTGACTGCCGCGGAG<br>AAACTGGATGGCGGCGGTTAG        | "                            |
| 23                  | CgKO-SGS1(+)    | ATGGTGACGA AGCCGCACA TAACTTAAGA AGGGAGCACA AATGGTTAAA<br>CACAGGAAAC AGCTATGACC   | <i>CgTRP1</i> on pBluescript |
| 24                  | CgKO-SGS1(-)    | TCACCTTCTTCTCTGTAGTGACCTCGGTAATTTCTAAAACCTCGTCTCC<br>GTTGTAAAAC GACGGCCAGT       | "                            |
| 25                  | URA75kb(+)      | ATAGCTAGGT AATTTTAATC TGGGGAGAGA AATGGTGAAC TTTTTTCAAT<br>CACTATAGGGCGAATTGGGTAC | <i>KIURA3</i> on pBluescript |
| 26                  | URA75kb(-)      | CTGAAATTGAAGCAGCACCACAAGATATCAATCAACAACCGAATCAATAA<br>AAAGGGAACAAAAGCTGGAGC      | "                            |
| 27                  | r52-FPfuse(+)   | GAGAAGTTGGAAGACCAAAGATCAATCCCTGCATGCACGCAAGCCTACT<br>TCTAAAGGTGAAGAATTATTCACTGG  | pNB0263                      |

|                              |                 |                                                                                     |                                                        |
|------------------------------|-----------------|-------------------------------------------------------------------------------------|--------------------------------------------------------|
| 28                           | r52-FPfuse(-)   | AGTAATAAATAATGATGCAAATTTTTATTGTTTCGGCCAGGAAGCGTT<br>TTAGTATCGAATCGACAGCAG           | "                                                      |
| 29                           | REV3KO(+)       | ATGTCGAGGG AGTCGAACGA CACAATACAG AGCGATACGG TTAGATCATC<br>CACAGGAAAC AGCTATGACC     | <i>CgTRP1</i> on pBluescript                           |
| 30                           | REV3KO(-)       | TTTGAACAGATTGATTATCTCTCAAGTATCTTTCTGCTTTGACACGAGAG<br>GTTGTAAAAC GACGGCCAGT         | "                                                      |
| 31                           | RAD52KO(+)      | GGAGGTTGCC AAGAACTGCT GAAGGTTCTG GTGGCTTTGG TGTGTTGTTG<br>CACAGGAAAC AGCTATGACC     | <i>CgTRP1</i> on pBluescript                           |
| 32                           | RAD52KO(-)      | AGTAATAAATAATGATGCAAATTTTTATTGTTTCGGCCAGGAAGCGTT<br>GTTGTAAAAC GACGGCCAGT           | "                                                      |
| 33                           | CgKO-sml1(+)    | GATCTTACGG TCTCACTAAC CTCTCTTCAA CTGCTCAATA ATTTCCCGCT<br>CACAGGAAAC AGCTATGACC     | <i>CgTRP1</i> on pBluescript                           |
| 34                           | CgKO-sml1(-)    | CAGAACTAGTGGGAAATGGAAAGAGAAAAGAAAAGAGTATGAAAGGAACT<br>GTTGTAAAAC GACGGCCAGT         | "                                                      |
| 35                           | PrKO-ddc2(+)    | CACGAAACGT CAACACAATC ATCAAACCTCT TTTGCATATT TCTATTATAG<br>GATCTGTTTAGCTTGCCTCGTCCC | pNB0132                                                |
| 36                           | PrKO-ddc2(-)    | TCTTTCCTAAAACGAAAATAATATAAATTATATATAGTTAATATTAAGCA<br>AAACTGGATGGCGGCGGTTAG         | "                                                      |
| 37                           | U3KO(+)         | GGAGCACAGACTTAGATTGG                                                                | pNB0841 or pNB0843                                     |
| 38                           | U3KO(-)         | CTTTGTCGCTCTTCGCAATGTC                                                              | "                                                      |
| check primers                |                 |                                                                                     |                                                        |
| 39                           | Cgchk(-)        | GGTCATAGCTGTTTCCTGTG                                                                | changes marked with <i>KIURA3</i> or <i>CgTRP1</i>     |
| 40                           | apn1KOchk(+)    | GCGGC CAAGAAGGAA CCGATTACAG                                                         | deletion of <i>APN1</i>                                |
| 41                           | met25pchk(-)    | CGAGGCAAGCTAAACAGATC                                                                | changes marked with KanR                               |
| 42                           | URA197chk(-)    | GTACCCAATTCGCCTATAGTG                                                               | <i>KIURA3</i> insertions                               |
| 43                           | URA17kbchk(+)   | GACTGGGAAGTTCTGTCTAG                                                                | <i>KIURA3</i> at -17kb                                 |
| 44                           | URA8kbchk(+)    | CTCAGGAAAATTACTGGCGAAGG                                                             | <i>KIURA3</i> at -8kb                                  |
| 45                           | URA5kbchk(+)    | CGCATCTTCAAACGGCAGCAAG                                                              | <i>KIURA3</i> at -5kb                                  |
| 46                           | URAsfmchk(+)    | cccagctttgtcccttagtg                                                                | <i>KIURA3</i> inside pNB0537                           |
| 47                           | URA3kbchkv2(+)  | GTCATTGAGATATGATAGCCTGTCC                                                           | <i>KIURA3</i> at 11kb                                  |
| 48                           | URA197chk(+)    | GCTCCAGCTTTTGTCCCTTT                                                                | <i>KIURA3</i> insertions                               |
| 49                           | URA11kbchkv2(-) | ATGTGCCTGATGAACTAACACAAGG                                                           | <i>KIURA3</i> at 15kb                                  |
| 50                           | URA0kbchkv2(+)  | TTCGAAAGCTCATCATATGGC                                                               | <i>KIURA3</i> at CHRI197000                            |
| 51                           | ADE2KOchk(+)    | CGCATCTGTTCTCTATCTTC                                                                | deletion of <i>ade2-1</i>                              |
| 52                           | CAN1KOchk(+)    | gcttagcattgcccgttg                                                                  | deletion of <i>can1-100</i>                            |
| 53                           | RAD52KOchk(+)   | ACTAAATGGTTGAATCGGGTC                                                               | deletion of <i>RAD52</i>                               |
| 54                           | CHRIinschV2(+)  | TTCCTACACCTCGGACATGGATTTG                                                           | integration of pNB0537 and pNB0639                     |
| 55                           | CHRIinschk(-)   | CCCTATCAGTGATAGAGACGGACG                                                            | integration of pNB0537                                 |
| 56                           | URA75kbchk(+)   | GAGGAAAAGATTCATCAACTGGC                                                             | <i>KIURA3</i> at -82kb                                 |
| 57                           | PrKO-EXO1chk(+) | CTGAGGTTGACTACTACGAGC                                                               | Deletion of <i>EXO1</i>                                |
| 58                           | CgKO-SGS1chk(+) | GAAATGCGAAATGTGAAGGAAGAG                                                            | Deletion of <i>SGS1</i>                                |
| 59                           | REV3KOchk(+)    | GACGAGTGCAGTGCCTCTAG                                                                | Deletion of <i>REV3</i>                                |
| 60                           | sml1kochk(+)    | ATGTTTAGACCTCGTACATAGG                                                              | Deletion of <i>SML1</i>                                |
| 61                           | ddc2kochk(+)    | AAGAGTCAGACAGGCTCGC                                                                 | Deletion of <i>DDC2</i>                                |
| 62                           | U3KOchk(+)      | TGCGAGGCATATTTATGGTGAAG                                                             | Deletion of <i>URA3</i> with <i>TDH3pr-Mag1-sctetR</i> |
| 63                           | U3KOGPDchk(-)   | GGCAGTATTGATAATGATAAACTCG                                                           | "                                                      |
| plasmid construction primers |                 |                                                                                     |                                                        |
| 64                           | XhoI-GAL1(+)    | GCGGCCTCGAGCAAAAATTCTACTT                                                           | <i>GAL1pr</i>                                          |
| 65                           | BamHI-GAL1(-)   | GCGGCGGATCCGTTTTTCTCCTTGACG                                                         | "                                                      |
| 66                           | SpeI-CDG(+)     | ccgcgactagtaacaaa ATGCCGAAAAAAAACGCAAAGT<br>TTTGGAGAGAGCTGGAAGAAGC                  | CDG                                                    |
| 67                           | SacI-CDG(-)     | atattgagctcgttcattgctgcccgaagttctgtcacttatta CAGCTCCTCCAGTCAATGG                    | "                                                      |
| 68                           | SpeI-MAG(+)     | ccgcgactagtaacaaa ATGAAACTAAAAGGGAGTATGATG                                          | <i>MAG1</i>                                            |

|                                                                                   |                   |                                                                                               |                              |
|-----------------------------------------------------------------------------------|-------------------|-----------------------------------------------------------------------------------------------|------------------------------|
| 69                                                                                | SacI-MAG(-)       | atattgagctcgttcatgtgcgggcctaagttctgtcgactta TTAGGATTCACGAAATTTCTTC                            | "                            |
| 70                                                                                | Sall-ACT1UTR(+)   | ataatgtcgacgttcatgtgcgggccg TCTGCTTTTGTGCGCGTATG                                              | <i>ACT1t</i>                 |
| 71                                                                                | SacI-ACT1UTR(-)   | cggcggagctc AATTTTTGAAATTTTCGTAGAAAAGGG                                                       | "                            |
| 72                                                                                | CDG-(sc)tetR(+)   | GGCAAGAAGC CCATTGACTG GAAGGAGCTG GTC GAC GGT GCT GGT TTA ATT AAC tctagattagataaaaagtaaag      | sctetR                       |
| 73                                                                                | MUT-(sc)tetR(-)   | GGTACATACATAAACATACGCGCACAAAAGCAGA ttatta GTCGCCGCTTTCGCACTTTAG                               | "                            |
| 74                                                                                | sctetR-GAL(+)     | ATACTTTAAC GTCAAGGAGA AAAAACTATA AACAAA ATGCCGAAAAAAAAACGCAAAGTG tctagattagataaaaagtaaag      | "                            |
| 75                                                                                | MAG-YFP(+)        | AT GAAGGCAGAA GAAAATTTCC TGAAATCC GTC GAC GGT GCT GGT TTA ATT AAC TCTAAAGGTGAAGAATTATTCACTGG  | vYFP                         |
| 76                                                                                | ACT1t-YFP(-)      | GGTACATACATAAACATACGCGCACAAAAGCAGA TTATTA TTTGTACAATTCATCCATACCATGG                           | "                            |
| 77                                                                                | MAG-(sc)tetR(+)   | AT GAAGGCAGAA GAAAATTTCC TGAAATCC GTC GAC GGT GCT GGT TTA ATT AAC tctagattagataaaaagtaaag     | sctetR                       |
| 78                                                                                | CDG-YFP(+)        | GGCAAGAAGC CCATTGACTG GAAGGAGCTG GTC GAC GGT GCT GGT TTA ATT AAC TCTAAAGGTGAAGAATTATTCACTGG   | vYFP                         |
| 79                                                                                | Gal-YFP(+)        | ATACTTTAAC GTCAAGGAGA AAAAACTATA AACAAA ATGCCGAAAAAAAAACGCAAAGTG TCTAAAGGTGAAGAATTATTCACTGG   | "                            |
| 80                                                                                | AscI-chr1up(+)    | tatgcgcgcgcgcc ATTTTGACATATACTGATATGGACCTC                                                    | CHRI:197000 5' homology      |
| 81                                                                                | XbaI-chr1up(-)    | gcggctctaga TTCAGATATGAGGCCATAAATGGAG                                                         | "                            |
| 82                                                                                | NotI-chr1ins25(+) | GTGGT GCGGCCGC TTTCAAGTAG TTCACAAAGA                                                          | CHRI:197000 3' homology      |
| 83                                                                                | AscI-chr1ins23(-) | ATAAT GGCGCCCC CAATCGCTGG GAATGAGCAA                                                          | "                            |
| 84                                                                                | XhoI-ade2(+)      | gaggactcgagcctagg AAGCTTTTGACCAGGTTATTATAAAAAG                                                | <i>ade2-1</i> cassette       |
| 85                                                                                | XhoI-ade2(-)      | gaggactcgag CAGGTAATTATTCCTTGCTTCTTG                                                          | "                            |
| 86                                                                                | Apal-KIU(+)       | tatta gggccc ggagacaac                                                                        | <i>KIURA3</i> on pBluescript |
| 87                                                                                | Hind3-KIU(-)      | gagga aagctt GCTTATCGCAATGGTTGTAATGG                                                          | "                            |
| 88                                                                                | GAL10-MAG1(+)     | TGATTATTAACATCTTTGCGTCCATCCAAAAAAGTAAGAATTTTTG gctagc aacaaa ATGAAACTAAAAGGGAGTATGATG         | <i>MAG1</i>                  |
| 89                                                                                | pBS-ACT1(-)       | tgcgcaactgttgggaagggcgatcgggtgcgggcctcttcgctattacgc cccggg AATTTTTGAAATTTTCGTAGAAAAGGG        | "                            |
| 90                                                                                | sctetR-FOKI(-)    | CTTCTCCTCCAGCTCGCTCTTACCAGCTG GTTAATTAACCAGCACCGTCGAC GTCGCCGCTTTCGCACTTTAG                   | sctetR                       |
| 91                                                                                | NdeI-U3f(+)       | gagga catatg gcggccgc TAGTGTTGAAGAAACATGAAATTGCC                                              | pRS316                       |
| 92                                                                                | NcoI-U3f(-)       | gagga CCATGG GCGCGGCC actagt GCTAGC ATAACCTCGTATAATGTATGCTATACGAAGTTAT AAAAATCAGTCAAGATATCCAC | "                            |
| 93                                                                                | NheI-GPDMS(+)     | gagga gctagc CGAGTTTATCATTATCAATACTGCC                                                        | pNB0844                      |
| 94                                                                                | PciI-GPDMS(-)     | gagga acatgt ggcgcgcc ATAACCTCGTATAATGTATGCTATACGAAGTTAT AATTTTTGAAATTTTCGTAGAAAAGGG          | "                            |
| 95                                                                                | SpeI GCN5(+)      | agaag actagt tcttaaacacttatgggcagc                                                            | genomic DNA                  |
| 96                                                                                | PstI GCN5(-)      | gcggc CTGCAG ATATAGTTACATAAAGGTAATACCAACG                                                     | "                            |
| 97                                                                                | PstI SPT15(+)     | gagga ctgcag gaattgtacttcttcgaaatcg                                                           | "                            |
| 98                                                                                | NheI SPT15(-)     | GCGGC gctagc ttaattaa ATAACATCTTATTATAAAACATTGATATATAAATATAG                                  | "                            |
| 99                                                                                | EcoRI SPT3(+)     | gagga gaattc GATGTTGCGTTACATGTCTTAG                                                           | "                            |
| 100                                                                               | BsiWI SPT3(-)     | gagga cgtacg cacgcaatttttaactactgagttc                                                        | "                            |
| 101                                                                               | BsiWI TAF12(+)    | gagga cgtacg GTTCTCTCGTTGATACTTTTAGCC                                                         | "                            |
| 102                                                                               | Hind3 TAF12(-)    | cgccg aagctt ggtcat gctagc ttattttttgtattcaacgat gcaacattgttccattgtttttg                      | "                            |
| 103                                                                               | NheI CYC1(+)      | gagga gctagc CATGTAATTAGTTATGTCACGC                                                           | "                            |
| 104                                                                               | Hind3 CYC1(-)     | GCGGC aagctt TAAAGCCTTCGAGCGTCCC                                                              | "                            |
| primers to confirm distances of markers from the 240x array on the telomeric side |                   |                                                                                               |                              |
| 105                                                                               | 46451(+)          | tgtcaactcaacgattcttagg                                                                        | genomic DNA                  |
| 106                                                                               | 46241(-)          | CACTATAGCTTGCTGTATGTCTC                                                                       | "                            |
| 107                                                                               | 42459(+)          | GAGAAATTGGCTACTTAGGAAGAG                                                                      | "                            |
| 108                                                                               | 42393(-)          | GCTGAATACGATATGGACTAGAG                                                                       | "                            |

| sequencing primers                             |             |                           |   |
|------------------------------------------------|-------------|---------------------------|---|
| 109                                            | KIU-seq1(+) | cgttcatggtgacactttagc     | " |
| 110                                            | KIU-seq2(+) | CATCAAATGGTGGTTATTCGTGG   | " |
| 111                                            | KIU-seq1(-) | GTAAGATGAAGTTGAAGTAGTGTTC | " |
| 112                                            | KIU-seq2(-) | CTCTTTTCGATGATGTAGTTCTGG  | " |
| * Cassette means promoter, ORF, and terminator |             |                           |   |
